# Supplementary material for: Leaf Age-Dependent Photosystem II Photochemistry and Oxidative Stress Responses to Drought Stress in Arabidopsis thaliana Are Modulated by Flavonoid Accumulation
Source: MDPI journal article supplement (doi:10.3390/molecules26144157), 2021-07-08
Supplement: s1 [file s1]

Supplementary Information

# Leaf Age-Dependent Photosystem II Photochemistry and Oxidative Stress Responses to Drought Stress in *Arabidopsis thaliana* are Modulated by Flavonoid Accumulation

Ilektra Sperdouli<sup>1,2</sup> , Julietta Moustaka<sup>1,3</sup> , Georgia Ouzounidou<sup>4</sup> and Michael Moustakas<sup>1\*</sup> 

<sup>1</sup> Department of Botany, Aristotle University of Thessaloniki, GR-54124 Thessaloniki, Greece; moustak@bio.auth.gr

<sup>2</sup> Present address: Institute of Plant Breeding and Genetic Resources, Hellenic Agricultural Organization-Demeter (ELGO-Dimitra), Thessaloniki, 57001 Thessaloniki, Greece; ilektras@bio.auth.gr

<sup>3</sup> Present address: Department of Plant and Environmental Sciences, University of Copenhagen, Thorvaldsensvej 40, DK-1871 Frederiksberg C, Denmark; moustaka@plen.ku.dk

<sup>4</sup> Institute of Food Technology, Hellenic Agricultural Organization-Demeter (ELGO-Dimitra), 1 S. Venizelou Str., GR-14123 Lycovrissi, Greece; geouz@nagref.gr

\* Correspondence: moustak@bio.auth.gr

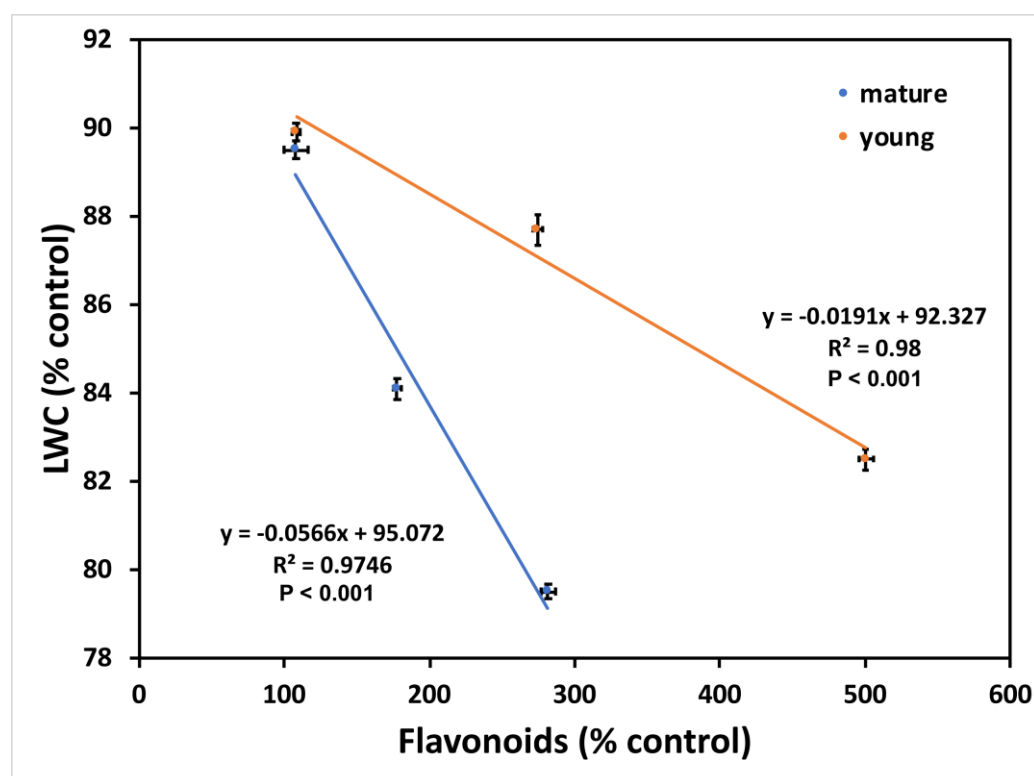

**Figure S1.** The relationship between leaf water content and flavonoid accumulation expressed as percentage of control (well-watered plants), in both *A. thaliana* young leaves and mature leaves at the three DS treatments. Error bars represent  $\pm$  standard error of the mean ( $n = 5-6$ ).
